# Supplementary material for: Efficacy and safety of liver support devices in acute and hyperacute liver failure: a systematic review and network meta-analysis
Source: PubMed Central journal article supplement (PMC7893063; doi:10.1038/s41598-021-83292-z), 2021-02-18

## Supplementary material

### Efficacy and safety of liver support devices' in acute and hyperacute liver failure: A systematic review and network meta-analysis

Anna Kanjo<sup>1,2,3</sup>, Klementina Ocskay<sup>1</sup>, Noémi Gede<sup>1</sup>, Szabolcs Kiss<sup>1,3</sup>, Zsolt Szakács<sup>1,4</sup>, Andrea Párniczky<sup>1,2,3</sup>, Steffen Mitzner<sup>5</sup>, Jan Stange<sup>5</sup>, Péter Hegyi<sup>1,3,4</sup>, Zsolt Molnár<sup>\*1,3,6</sup>

<sup>1</sup> Institute for Translational Medicine, Medical School, University of Pécs, Pécs, Hungary

<sup>2</sup> Heim Pál National Paediatric Institute, Budapest, Hungary

<sup>3</sup> Doctoral School of Clinical Medicine, University of Szeged, Szeged, Hungary

<sup>4</sup> János Szentágothai Research Centre, University of Pécs, Pécs, Hungary

<sup>5</sup> Division of Nephrology, Department of Medicine, University of Rostock, Rostock, Germany

<sup>6</sup> Department of Anesthesiology and Intensive Therapy, Poznan University for Medical Sciences, Medical Faculty, Poznan, Poland

#### Table of contents

|                                                                          |          |
|--------------------------------------------------------------------------|----------|
| <b>1. In-hospital mortality.....</b>                                     | <b>3</b> |
| Figure S1 .....                                                          | 3        |
| Figure S2 .....                                                          | 3        |
| Figure S3 .....                                                          | 3        |
| Figure S4 .....                                                          | 4        |
| Figure S5 .....                                                          | 4        |
| Figure S6 .....                                                          | 4        |
| Figure S7 .....                                                          | 5        |
| Figure S8 .....                                                          | 5        |
| <b>2. In-hospital mortality in nonparacetamol-poisoned patients.....</b> | <b>6</b> |
| Figure S9 .....                                                          | 6        |
| Figure S10 .....                                                         | 6        |
| Figure S11 .....                                                         | 7        |
| Table S1 .....                                                           | 7        |
| Figure S12 .....                                                         | 8        |
| Figure S13 .....                                                         | 8        |
| Figure S14 .....                                                         | 8        |
| Figure S15 .....                                                         | 8        |
| <b>3. Hepatic encephalopathy.....</b>                                    | <b>9</b> |

|                                         |           |
|-----------------------------------------|-----------|
| Figure S16 .....                        | 9         |
| Figure S17 .....                        | 9         |
| Figure S18 .....                        | 10        |
| Table S2 .....                          | 10        |
| Figure S19 .....                        | 11        |
| Figure S20 .....                        | 11        |
| Figure S21 .....                        | 11        |
| <b>4. Risk of bias assessment .....</b> | <b>12</b> |
| Figure S22 .....                        | 12        |
| Figure S23 .....                        | 13        |
| Figure S24 .....                        | 13        |
| <b>5. Quality of evidence .....</b>     | <b>13</b> |
| Table S3 .....                          | 15        |
| Table S4 .....                          | 17        |
| Table S5 .....                          | 18        |
| Figure S25 .....                        | 19        |

## 1. In-hospital mortality

**Figure S1. Forest plot for in-hospital mortality, interventions compared to SMT**

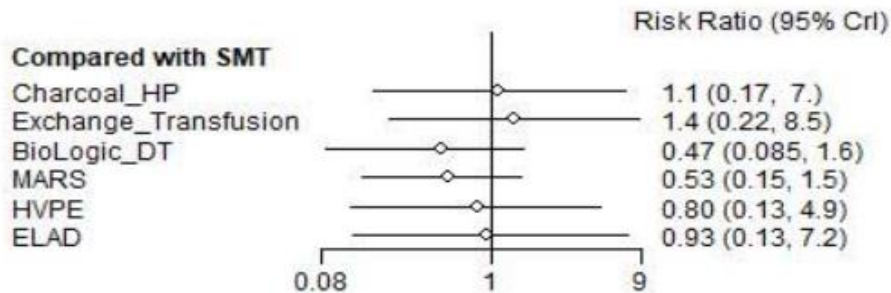

Abbreviations: SMT: standard medical therapy; Charcoal-HP: charcoal-hemoperfusion; HVPE: high-volume plasma exchange

**Figure S2. Forest plot for in-hospital mortality, interventions compared to HVPE**

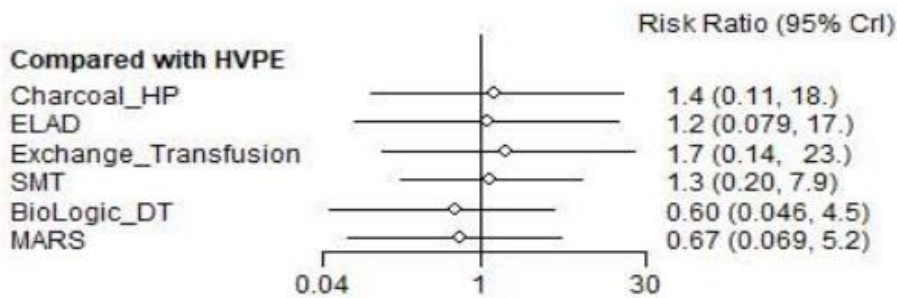

Abbreviations: HVPE: high-volume plasma exchange; SMT: standard medical therapy; Charcoal-HP: charcoal-hemoperfusion

**Figure S3. Forest plot for in-hospital mortality, interventions compared to ELAD**

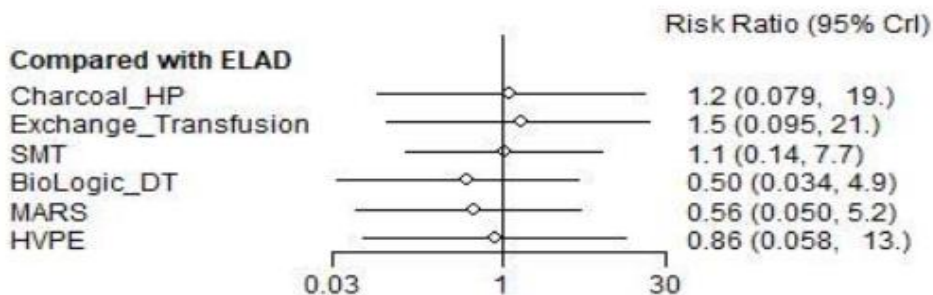

Abbreviations: HVPE: high-volume plasma exchange; SMT: standard medical therapy; Charcoal-HP: charcoal-hemoperfusion

**Figure S4. Forest plot for in-hospital mortality, interventions compared to charcoal-hemoperfusion**

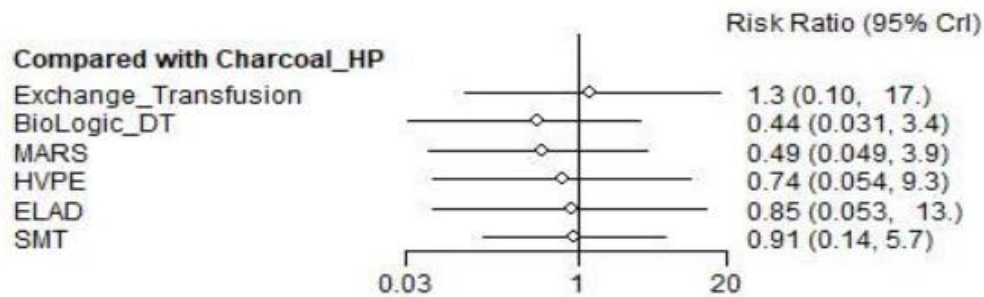

Abbreviations: HVPE: high-volume plasma exchange; SMT: standard medical therapy; Charcoal-HP: charcoal-hemoperfusion

**Figure S5. Forest plot for in-hospital mortality, interventions compared to exchange-transfusion**

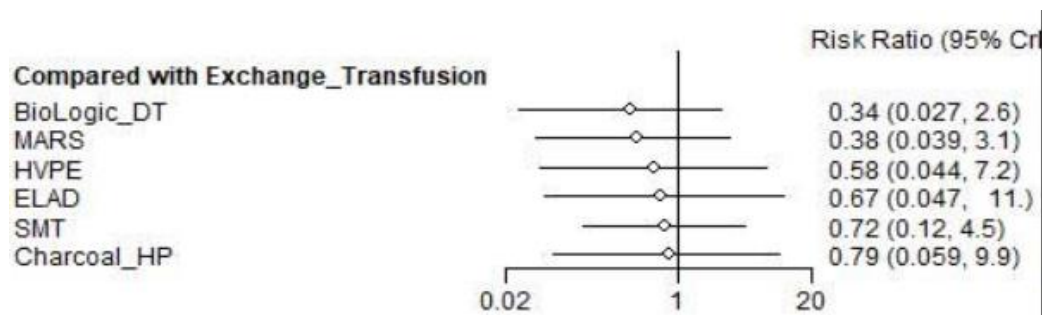

Abbreviations: HVPE: high-volume plasma exchange; SMT: standard medical therapy; Charcoal-HP: charcoal-hemoperfusion

**Figure S6. Forest plot for in-hospital mortality, interventions compared to BioLogic-DT**

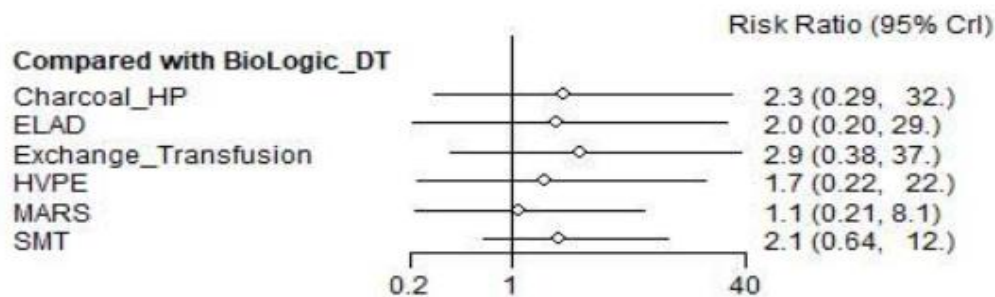

Abbreviations: HVPE: high-volume plasma exchange; SMT: standard medical therapy; Charcoal-HP: charcoal-hemoperfusion

**Figure S7. Forest plot for in-hospital mortality, interventions compared to MARS**

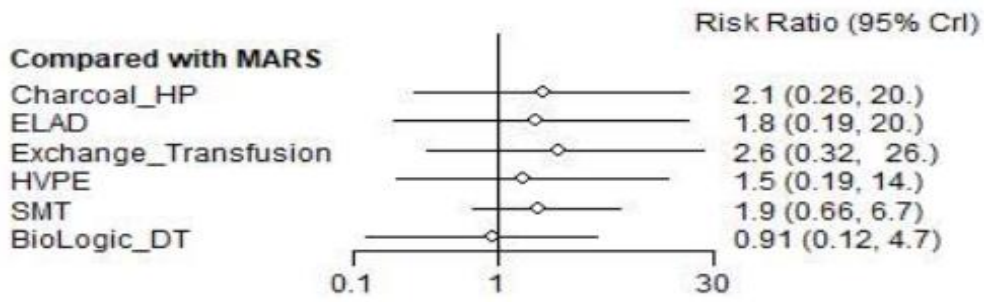

Abbreviations: HVPE: high-volume plasma exchange; SMT: standard medical therapy; Charcoal-HP: charcoal-hemoperfusion

**Figure S8. Cumulative ranking curves of in-hospital mortality**

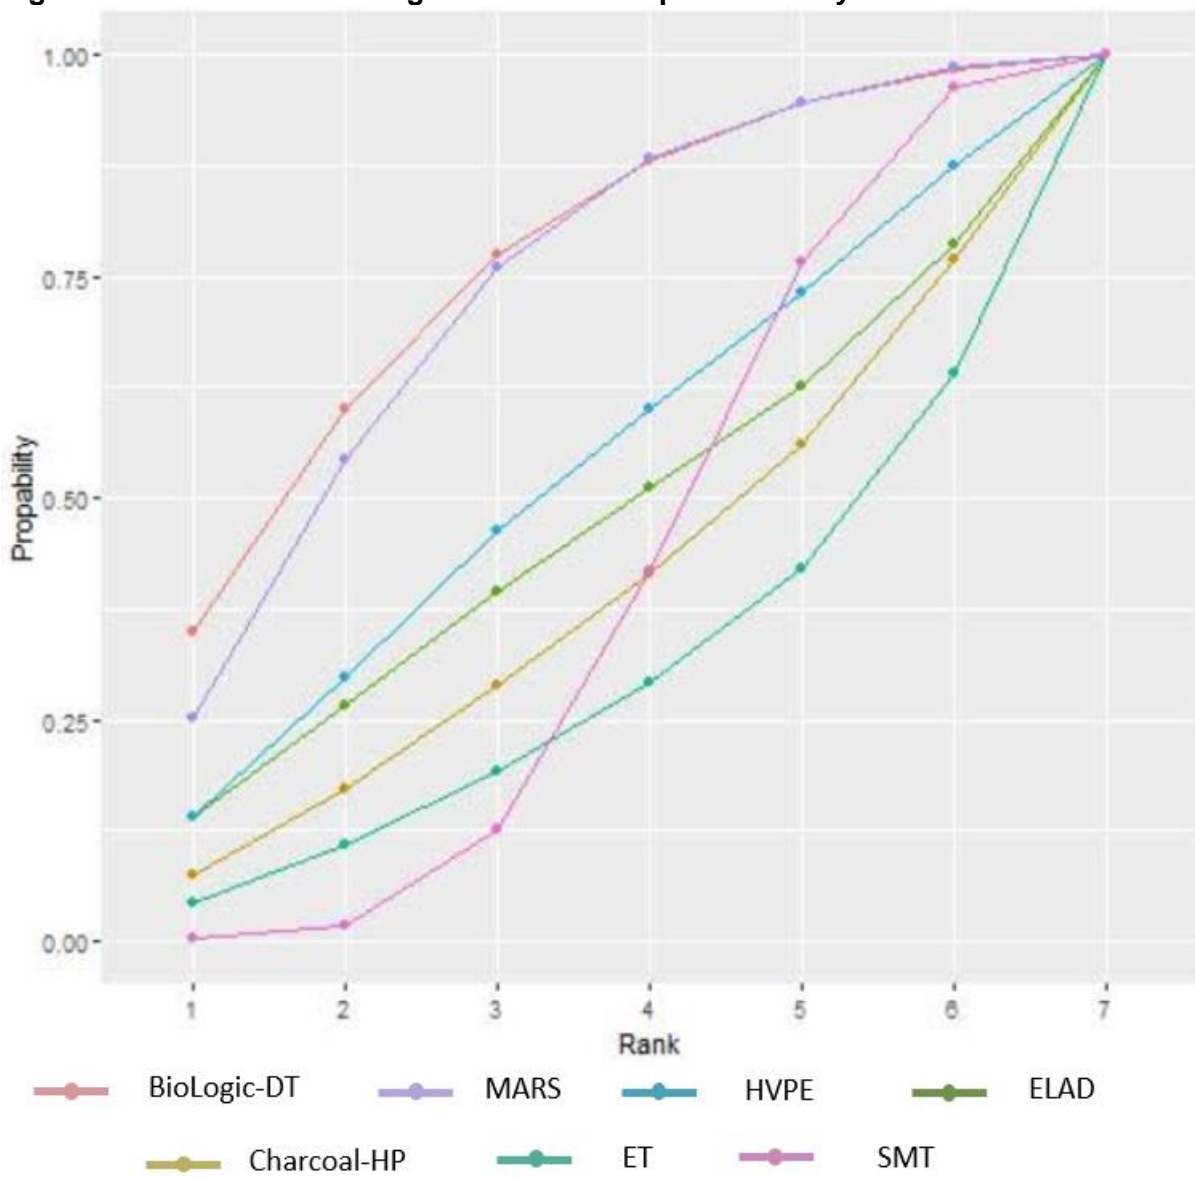

Abbreviations: HVPE: high-volume plasma exchange; Charcoal-HP: charcoal-hemoperfusion; ET: exchange transfusion; SMT: standard medical therapy

## 2. In-hospital mortality in nonparacetamol-poisoned patients

Figure S9. The network geometry of the eligible comparisons of in-hospital mortality in nonparacetamol-poisoned patients.

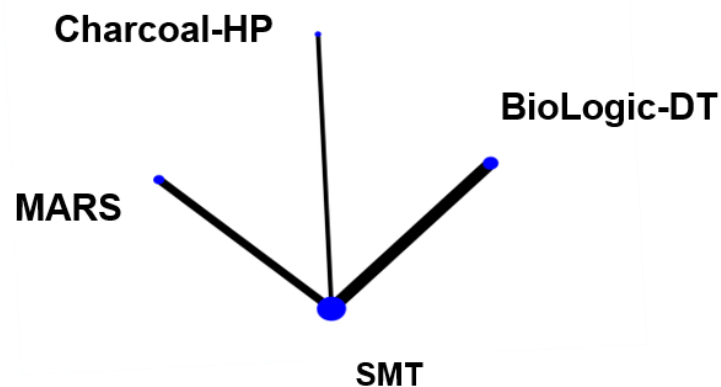

The thickness of the edges is proportional to the number of the head-to-head trials, and the size of the nodes is proportional to the number of studies in which the intervention was applied. Abbreviations: SMT: standard medical therapy, Charcoal-HP: charcoal-hemoperfusion

Figure S10. Cumulative ranking curves of in-hospital mortality in nonparacetamol-poisoned patients

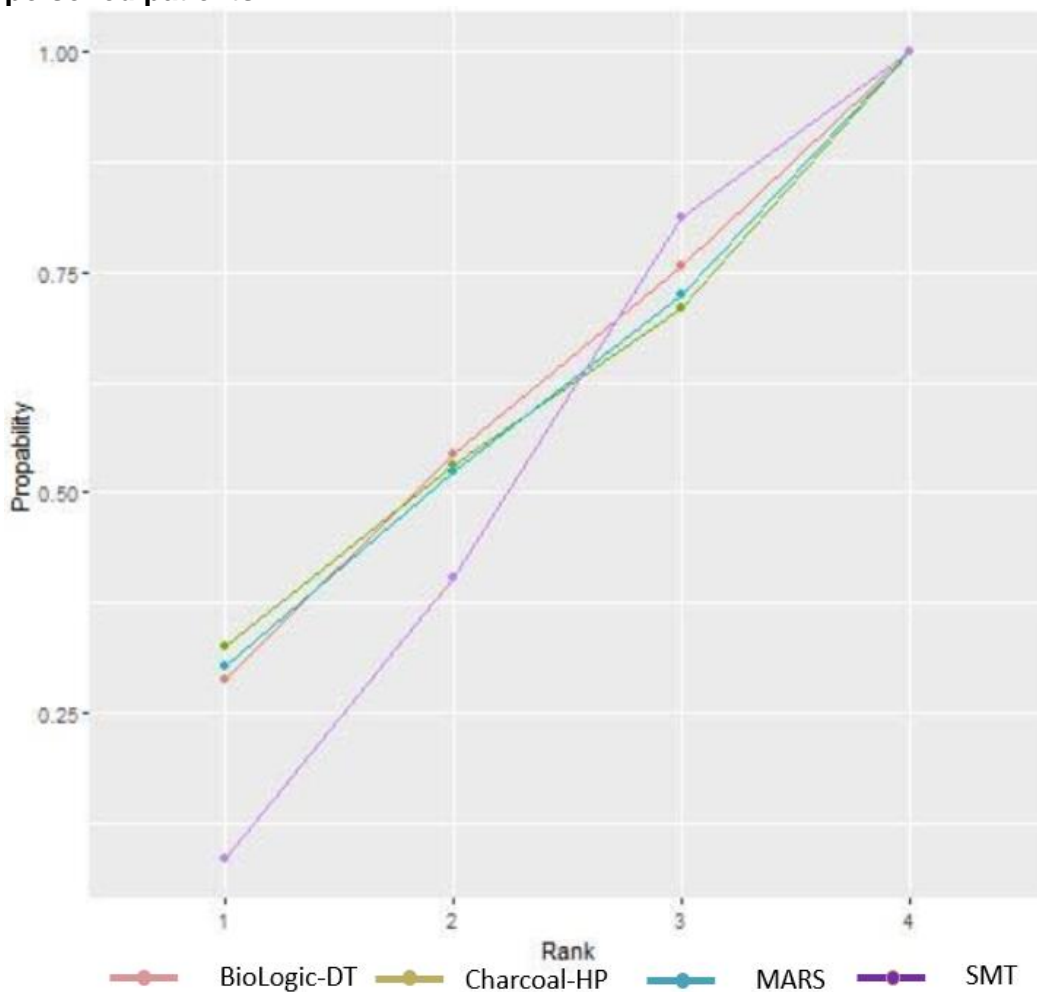

Abbreviations: SMT: standard medical therapy, Charcoal-HP: charcoal-hemoperfusion

**Figure S11. Surface under the cumulative ranking curves (SUCRA%) values of in-hospital mortality in nonparacetamol-poisoned patients.**

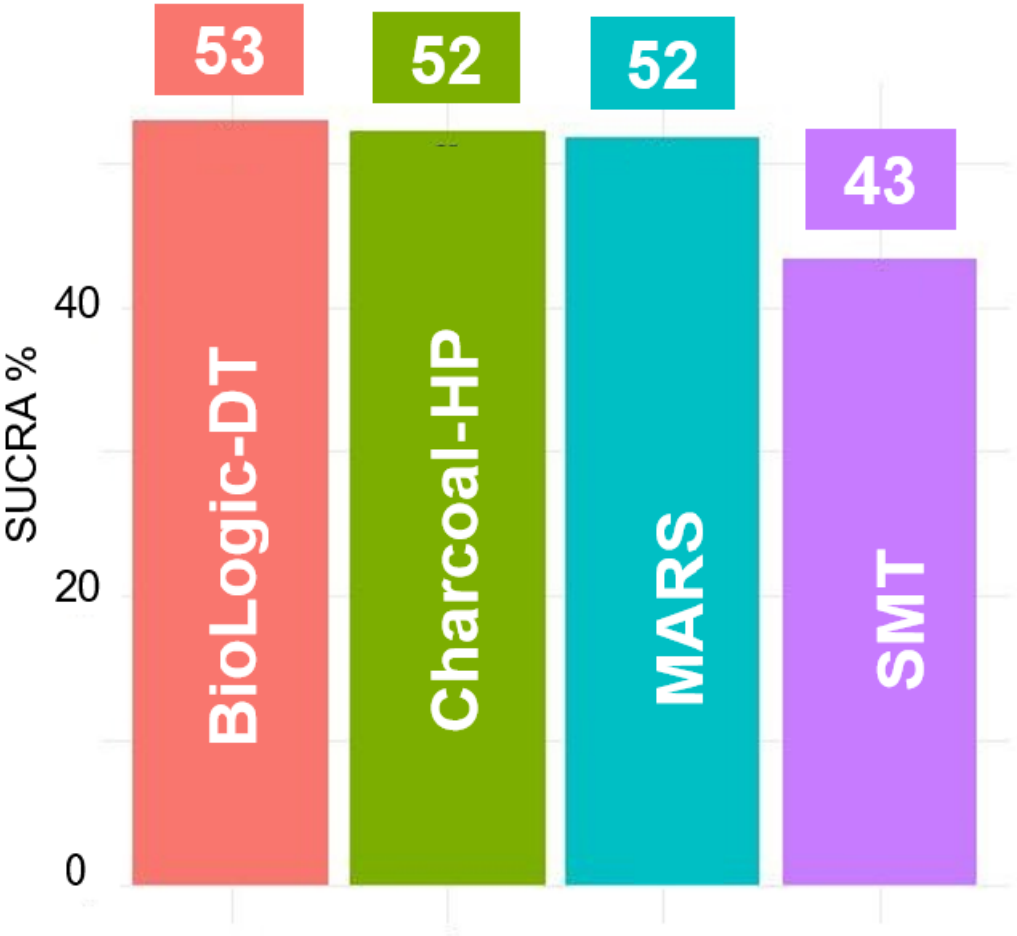

Abbreviations: Charcoal-HP: charcoal-hemoperfusion; SMT: standard medical therapy

**Table S1. League table of in-hospital mortality of non-paracetamol poisoned patients**

|                    |                    |                  |            |
|--------------------|--------------------|------------------|------------|
| <b>BioLogic-DT</b> |                    |                  |            |
| 1.0 (0.17, 4.4)    | <b>Charcoal-HP</b> |                  |            |
| 0.99 (0.20, 3.7)   | 0.99 (0.16, 5.5)   | <b>MARS</b>      |            |
| 0.93 (0.32, 2.1)   | 0.94 (0.23, 3.6)   | 0.94 (0.32, 2.9) | <b>SMT</b> |

The league table contains the risk ratios /RR/ (credible intervals /CrI/) for every possible comparison of the interventions. All the comparisons' overall risk of bias assessments were judged to raise some concern and according to the GRADE approach all comparisons were judged as very low quality ⊕○○○.

Abbreviations: Charcoal-HP: charcoal-hemoperfusion; SMT: standard medical therapy

**Figure S12. Forest plot for in-hospital mortality in nonparacetamol-poisoned patients, interventions compared to charcoal-hemoperfusion**

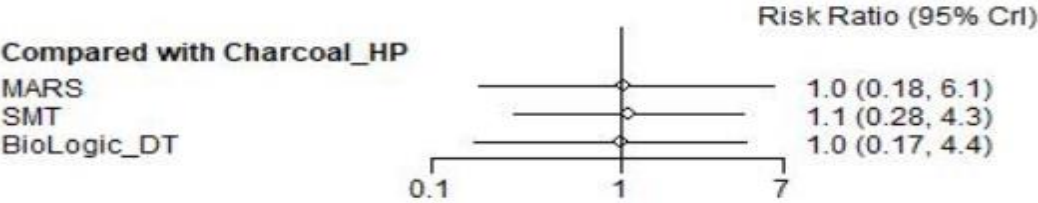

Abbreviations: Charcoal-HP: charcoal-hemoperfusion; SMT: standard medical therapy

**Figure S13. Forest plot for in-hospital mortality in nonparacetamol-poisoned patients, interventions compared to MARS**

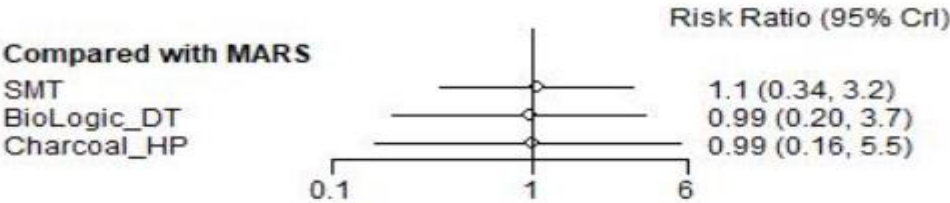

Abbreviations: Charcoal-HP: charcoal-hemoperfusion; SMT: standard medical therapy

**Figure S14. Forest plot for in-hospital mortality in nonparacetamol-poisoned patients, interventions compared to BioLogic-DT**

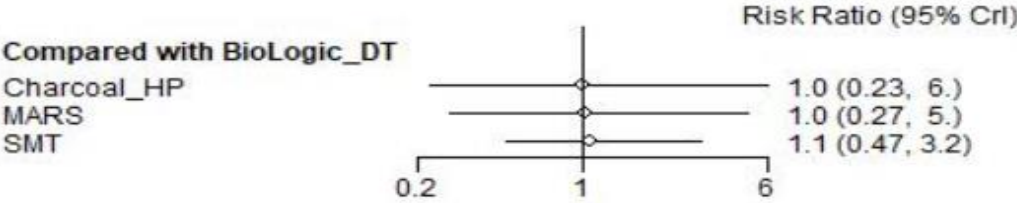

Abbreviations: Charcoal-HP: charcoal-hemoperfusion; SMT: standard medical therapy

**Figure S15. Forest plot for in-hospital mortality in nonparacetamol-poisoned patients, interventions compared to standard medical therapy**

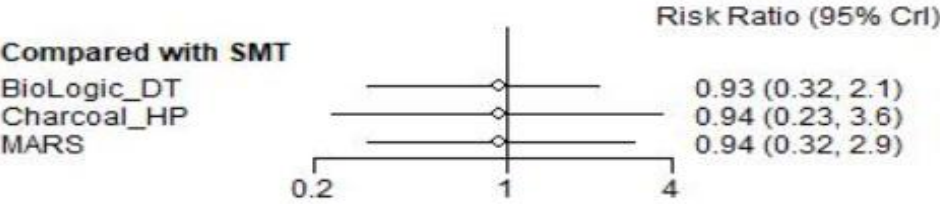

Abbreviations: Charcoal-HP: charcoal-hemoperfusion; SMT: standard medical therapy



### 3. Hepatic encephalopathy

Figure S16. The network geometry of the eligible comparisons of in-hospital mortality in nonparacetamol-poisoned patients.

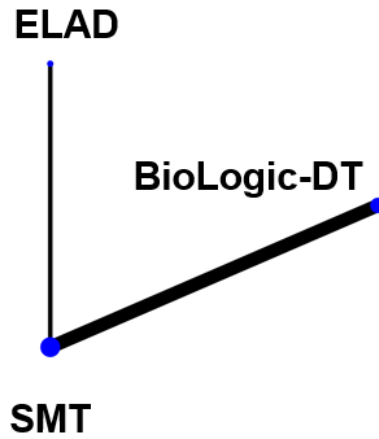

Abbreviation: SMT: standard medical therapy

Figure S17. Cumulative ranking curves of hepatic encephalopathy

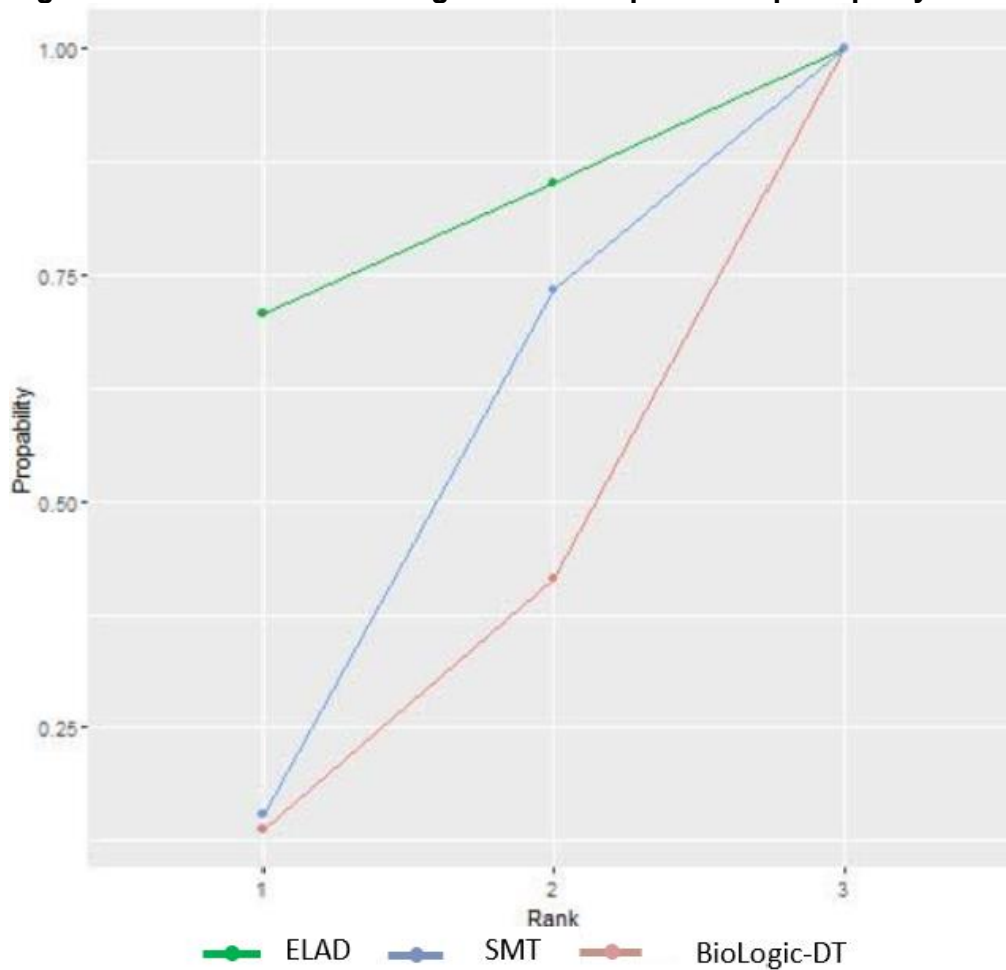

Abbreviation: SMT: standard medical therapy

**Figure S18. Surface under the cumulative ranking curves (SUCRA%) values of hepatic encephalopathy**

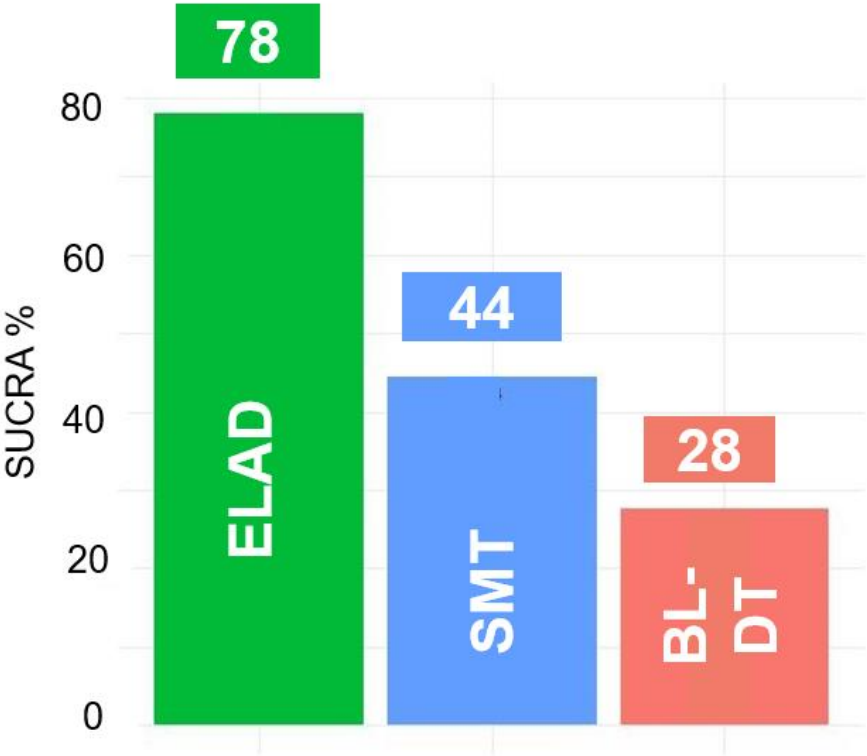

Abbreviations: SMT: standard medical therapy; BL-DT: BioLogic-DT

**Table S2. League table of hepatic encephalopathy**

|                        |                      |                    |
|------------------------|----------------------|--------------------|
| <b>ELAD</b>            |                      |                    |
| <b>0.65 (0.17-2.1)</b> | <b>SMT</b>           |                    |
| <b>0.56 (0.12-2.3)</b> | <b>0.85 (0.37-2)</b> | <b>BioLogic-DT</b> |

The league table contains the risk ratios /RR/ (credible intervals /CrI/) for every possible comparison of the interventions. The event was the number of patients whose hepatic encephalopathy worsened/not improved. The colour of the boxes indicates the comparisons' overall risk of bias assessment (green: low risk of bias, yellow: some concerns, red: high risk of bias). According to the GRADE approach all comparisons were judged as very low quality ⊕○○○.

**Figure S19. Forest plot hepatic encephalopathy, interventions compared to standard**

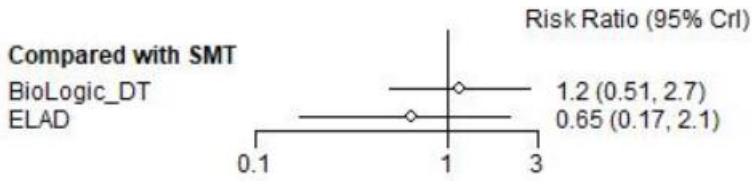

medical therapy

Abbreviations: SMT: standard medical therapy

**Figure S20. Forest plot hepatic encephalopathy, interventions compared to BioLogic-DT**

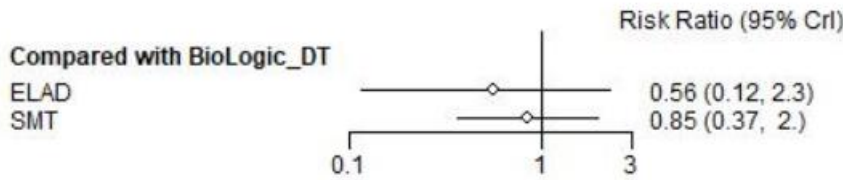

Abbreviations: SMT: standard medical therapy

**Figure S21. Forest plot hepatic encephalopathy, interventions compared to ELAD**

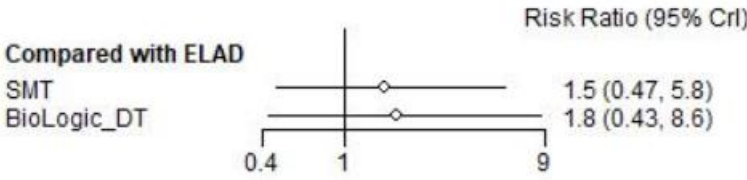

Abbreviations: SMT: standard medical therapy

#### 4. Risk of bias assessment

Figure S22. Risk of bias assessment

| Studies with intention-to-treat | Unique ID         | Study ID       | Experimental      | Comparator | Outcome                | Weight | Risk of bias assessment |                                   |                      |                            |                                  |         | Overall |               |
|---------------------------------|-------------------|----------------|-------------------|------------|------------------------|--------|-------------------------|-----------------------------------|----------------------|----------------------------|----------------------------------|---------|---------|---------------|
|                                 |                   |                |                   |            |                        |        | Randomization process   | Deviations from intended interven | Missing outcome data | Measurement of the outcome | Selection of the reported result | Overall |         |               |
|                                 |                   |                |                   |            |                        |        | +                       | ?                                 | +                    | +                          | +                                | ?       | !       | Low risk      |
|                                 | Mazariegos_1997   | Demetriou_2004 | BioLogic-DT       | SMT        | in-hospital mortality  |        | ?                       | +                                 | +                    | +                          | +                                | ?       | !       | Some concerns |
|                                 | O'Grady_1988      |                | Charcoal hemope   | SMT        | in-hospital mortality  |        | +                       | +                                 | +                    | +                          | +                                | ?       | !       | Some concerns |
|                                 | Hughes_1994       |                | BioLogic-DT       | SMT        | in-hospital mortality  |        | +                       | +                                 | +                    | +                          | +                                | ?       | !       | Some concerns |
|                                 | Wilkinson_1998    |                | BioLogic-DT       | SMT        | in-hospital mortality  |        | ?                       | +                                 | +                    | +                          | +                                | ?       | !       | Some concerns |
|                                 | Polllock_2004     |                | MARS              | SMT        | in-hospital mortality  |        | +                       | +                                 | +                    | +                          | +                                | ?       | !       | Some concerns |
|                                 | Redeker_1973      |                | Exchange transfu  | SMT        | in-hospital mortality  |        | +                       | +                                 | +                    | +                          | +                                | ?       | !       | Some concerns |
|                                 | Larsen_2016       |                | High-volume plasi | SMT        | in-hospital mortality  |        | +                       | +                                 | +                    | +                          | +                                | +       | +       | Low risk      |
|                                 | Saliba_2013       |                | MARS              | SMT        | in-hospital mortality  |        | +                       | +                                 | +                    | +                          | +                                | +       | +       | Low risk      |
|                                 | Ellis_1996        |                | ELAD              | SMT        | in-hospital mortality  |        | +                       | +                                 | +                    | +                          | +                                | ?       | !       | Some concerns |
|                                 | Ellis_1999        |                | BioLogic-DT       | SMT        | in-hospital mortality  |        | +                       | +                                 | +                    | +                          | +                                | ?       | !       | Some concerns |
|                                 | El Bana yosi_2007 |                | MARS              | SMT        | in-hospital mortality  |        | +                       | +                                 | +                    | +                          | +                                | ?       | !       | Some concerns |
|                                 | Demetriou_2004    |                | HepatAssist       | SMT        | thirty-day survival    |        | +                       | +                                 | +                    | +                          | +                                | +       | +       | Low risk      |
|                                 | Hughes_1994_HE    |                | BioLogic-DT       | SMT        | hepatic encephalopathy |        | +                       | +                                 | +                    | ?                          | +                                | ?       | !       | Some concerns |
|                                 | Ellis_1996_HE     |                | ELAD              | SMT        | hepatic encephalopathy |        | +                       | +                                 | +                    | +                          | +                                | ?       | !       | Some concerns |
|                                 | Ellis_1999_HE     |                | BioLogic-DT       | SMT        | hepatic encephalopathy |        | +                       | +                                 | +                    | +                          | +                                | ?       | !       | Some concerns |
|                                 | Wilkinson_1998_HE |                | BioLogic-DT       | SMT        | hepatic encephalopathy |        | ?                       | +                                 | +                    | +                          | +                                | ?       | !       | Some concerns |

**Figure S23. Risk of bias assessment of mortality outcomes, broken down to tools, shown in percentage**

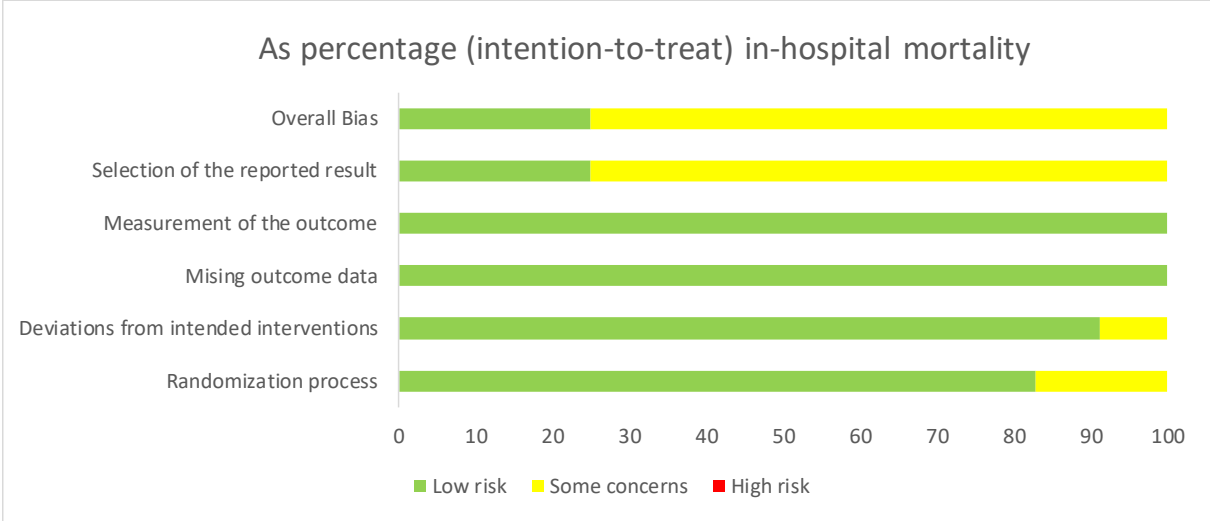

**Figure S24. Risk of bias assessment of hepatic encephalopathy, broken down to tools, shown in percentage**

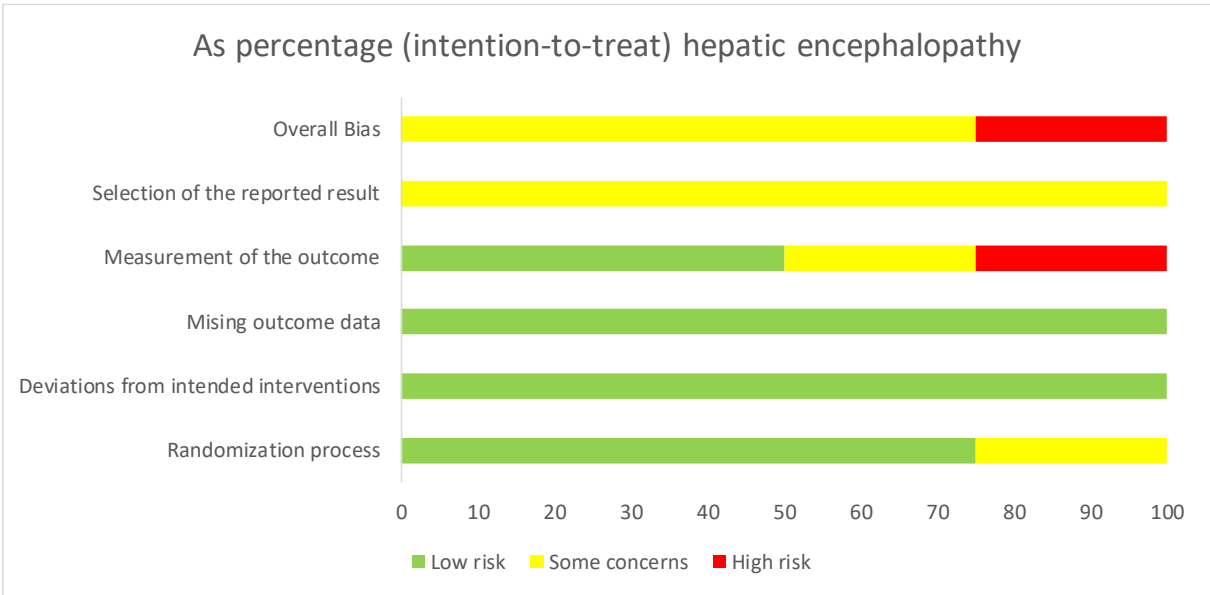

**5. Quality of evidence**

Risk of bias assessment was first performed on individual study-level according to the Revised Cochrane risk-of-bias tool for randomized trials (RoB 2). From the individual studies we chose the one which was at the highest risk of bias. Then we summarized the interventions’ overall RoB-assessment on the comparison level with the same method. When the comparison was at high risk of bias, we downgraded the quality of evidence by two, if it was judged to raise some concerns, we downgraded the quality of evidence by one.

Imprecision was judged based on the sample size calculation of the article of Larsen, 2016. Except for that study, none of the articles had the appropriate number of patients, thus we downgraded the quality of evidence in each comparison in every outcome by two.

Node splitting could not be performed due to the geometry of the networks, as a result inconsistency could not be tested.

Indirectness: the study populations were heterogenous in most of the studies, with different etiologies and disease onset. Methodological differences were found among the studies according to renal replacement and anticoagulant therapy detailed in *Table 1, Ancillary hemodialysis and use of anticoagulation therapy*. Differences in outcome measures were found concerning hepatic encephalopathy, according to the different scores applied. Indirectness could not be measured where there was only one head-to-head trial between two interventions.

'Comparison-adjusted' funnel plot was created with the frequentist approach, and Egger's test were performed in a network meta-analysis to assess small-study effect of in-hospital mortality. Asymmetry was not significant thus downgrading was not necessary. Considering in-hospital mortality in nonparacetamol-poisoned patients and hepatic encephalopathy due to the low number of articles funnel plot and Egger's test could not be performed.

The quality of evidence firstly was judged where head-to-head trials exist, then we chose the lowest quality of evidence for the indirect comparisons.

**Table S3 Summary of findings table of in-hospital mortality**

|                                      | BioLogic-DT vs SMT                                                                                                                          | MARS vs SMT                                                                 | HVPE vs SMT          | ELAD vs SMT              | Charcoal-HP vs SMT       | ET vs SMT                |
|--------------------------------------|---------------------------------------------------------------------------------------------------------------------------------------------|-----------------------------------------------------------------------------|----------------------|--------------------------|--------------------------|--------------------------|
| <b>Study limitations<sup>1</sup></b> | ↓                                                                                                                                           | ↓                                                                           | -                    | ↓                        | ↓                        | ↓                        |
| <b>Comments</b>                      | some concerns                                                                                                                               | some concerns                                                               | low risk of bias     | some concerns            | some concerns            | some concerns            |
| <b>Imprecision<sup>2</sup></b>       | ↓↓                                                                                                                                          | ↓↓                                                                          | -                    | ↓↓                       | ↓↓                       | ↓↓                       |
| <b>Inconsistency<sup>3</sup></b>     | -                                                                                                                                           | -                                                                           | -                    | -                        | -                        | -                        |
| <b>Indirectness<sup>4</sup></b>      | ↓                                                                                                                                           | ↓                                                                           | -                    | -                        | -                        | -                        |
| <b>Comments</b>                      | different study populations, HD was performed at the physician's discretion (Ellis, 1999) or was not allowed (Wilkinson, 1998; Hughes 1994) | different study populations, HD was performed at the physician's discretion |                      |                          |                          |                          |
| <b>Publication bias<sup>5</sup></b>  | -                                                                                                                                           | -                                                                           | -                    | -                        | -                        | -                        |
| <b>GRADE</b>                         | very low quality<br>⊕○○○                                                                                                                    | very low quality<br>⊕○○○                                                    | high quality<br>⊕⊕⊕⊕ | very low quality<br>⊕○○○ | very low quality<br>⊕○○○ | very low quality<br>⊕○○○ |

The table includes information from 11 studies and 479 patients

<sup>1</sup> Detailed information on study limitations can be found in *Figure S22-24*

<sup>2</sup> Imprecision was judged based on the sample size calculation of the article of Larsen, 2016.

<sup>3</sup> Node splitting could not be performed due to network geometry, inconsistency could not be tested.

<sup>4</sup> Indirectness could not be judged where there was only one head-to-head trial between two interventions

<sup>5</sup> Publication bias was judged by the 'comparison-adjusted' funnel plot and Egger's test (*Figure S25*), asymmetry is not significant thus downgrading was not necessary



**Table S4 Summary of findings table of in-hospital mortality in nonparacetamol-poisoned patients**

|                                      | BioLogic-DT vs SMT                                                                                                                          | MARS vs SMT                                                                 | Charcoal-HP vs SMT       |
|--------------------------------------|---------------------------------------------------------------------------------------------------------------------------------------------|-----------------------------------------------------------------------------|--------------------------|
| <b>Study limitations<sup>1</sup></b> | ↓                                                                                                                                           | ↓                                                                           | ↓                        |
| <b>Comments</b>                      | some concerns                                                                                                                               | some concerns                                                               | some concerns            |
| <b>Imprecision<sup>2</sup></b>       | ↓↓                                                                                                                                          | ↓↓                                                                          | ↓↓                       |
| <b>Inconsistency<sup>3</sup></b>     | -                                                                                                                                           | -                                                                           | -                        |
| <b>Indirectness<sup>4</sup></b>      | ↓                                                                                                                                           | ↓                                                                           | -                        |
| <b>Comments</b>                      | different study populations, HD was performed at the physician's discretion (Ellis, 1999) or was not allowed (Wilkinson, 1998; Hughes 1994) | different study populations, HD was performed at the physician's discretion |                          |
| <b>Publication bias<sup>5</sup></b>  | -                                                                                                                                           | -                                                                           | -                        |
| <b>GRADE</b>                         | very low quality<br>⊕○○○                                                                                                                    | very low quality<br>⊕○○○                                                    | very low quality<br>⊕○○○ |

The table includes information from 6 studies and 150 patients

<sup>1</sup> Detailed information on study limitations can be found in Figure S22-24

<sup>2</sup> Imprecision was judged based on the sample size calculation of the article of Larsen, 2016.

<sup>3</sup> Node splitting could not be performed due to network geometry, inconsistency could not be tested.

<sup>4</sup> Indirectness could not be judged where there was only one head-to-head trial between two interventions

<sup>5</sup> Due to the low number of articles funnel plot and Egger's test could not be performed

**Table S5 Summary of findings table of hepatic encephalopathy**

|                                      | <b>BioLogic-DT vs SMT</b>                                                                                                                  | <b>ELAD vs SMT</b>       |
|--------------------------------------|--------------------------------------------------------------------------------------------------------------------------------------------|--------------------------|
| <b>Study limitations<sup>1</sup></b> | ↓                                                                                                                                          | ↓↓                       |
| <b>Comments</b>                      | some concerns                                                                                                                              | high risk of bias        |
| <b>Imprecision<sup>2</sup></b>       | ↓↓                                                                                                                                         | ↓↓                       |
| <b>Inconsistency<sup>3</sup></b>     | -                                                                                                                                          | -                        |
| <b>Indirectness<sup>4</sup></b>      | ↓                                                                                                                                          | -                        |
| <b>Comments</b>                      | different applied neurological tests/scales, no detailed information on the implementation, the result is greatly affected by the assessor |                          |
| <b>Publication bias</b>              | -                                                                                                                                          | -                        |
| <b>GRADE</b>                         | very low quality<br>⊕○○○                                                                                                                   | very low quality<br>⊕○○○ |

The table includes information from 4 studies and 47 patients

<sup>1</sup> Detailed information on study limitations can be found in Figure S22-24

<sup>2</sup> Imprecision was judged based on the sample size calculation of the article of Larsen, 2016.

<sup>3</sup> Node splitting could not be performed due to network geometry, inconsistency could not be tested.

<sup>4</sup> Indirectness could not be judged where there was only one head-to-head trial between two interventions

<sup>5</sup> Due to the low number of articles funnel plot and Egger's test could not be performed

Figure S25 'Comparison-adjusted' Funnel plot and Egger's test of in-hospital mortality

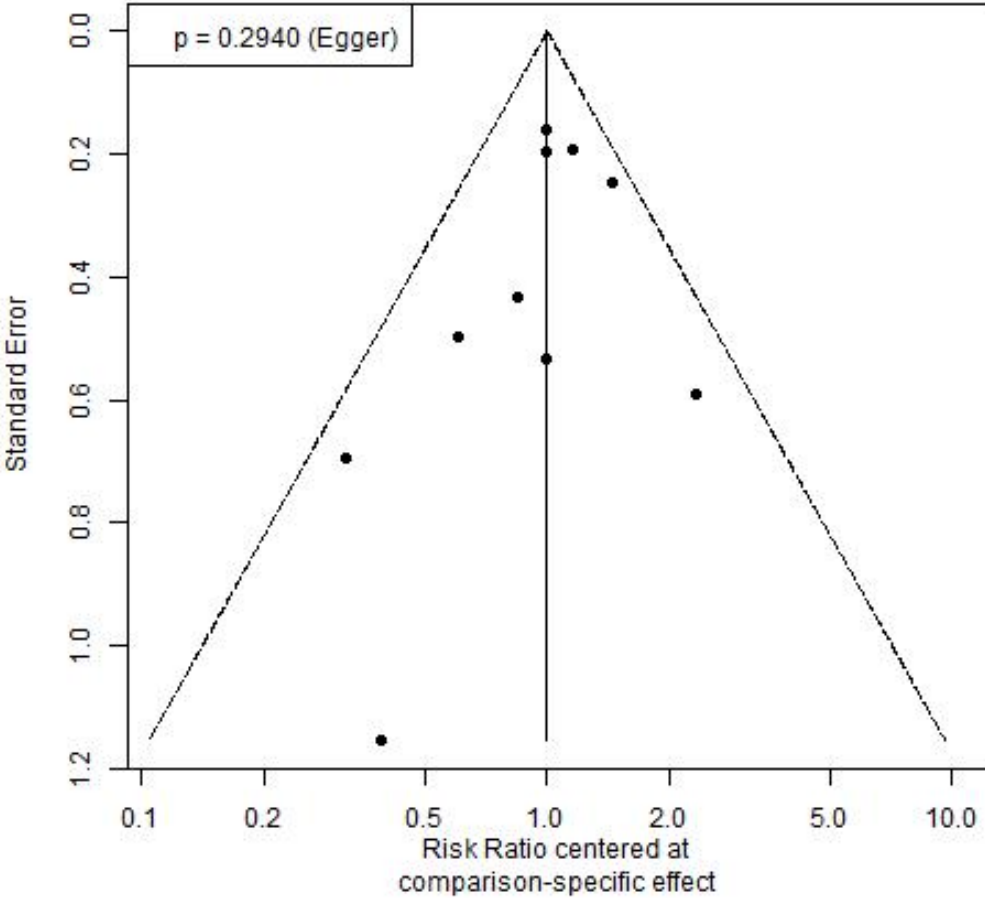

Supplement: 41598_2021_83292_MOESM1_ESM.pdf [file 41598_2021_83292_MOESM1_ESM.pdf]
